# Supplementary material for: Ozone pollution may limit the benefits of irrigation to wheat productivity in India
Source: Copernicus journal article supplement (doi:10.5194/bg-22-4203-2025), 2025-08-26
Supplement: Supplementary file 1 [file bg-22-4203-2025-supplement.pdf]

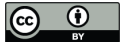

*Supplement of*

## **Ozone pollution may limit the benefits of irrigation to wheat productivity in India**

**Gabriella Everett et al.**

*Correspondence to:* Lisa Emberson ([l.emberson@york.ac.uk](mailto:l.emberson@york.ac.uk))

The copyright of individual parts of the supplement might differ from the article licence.

## Supplementary material

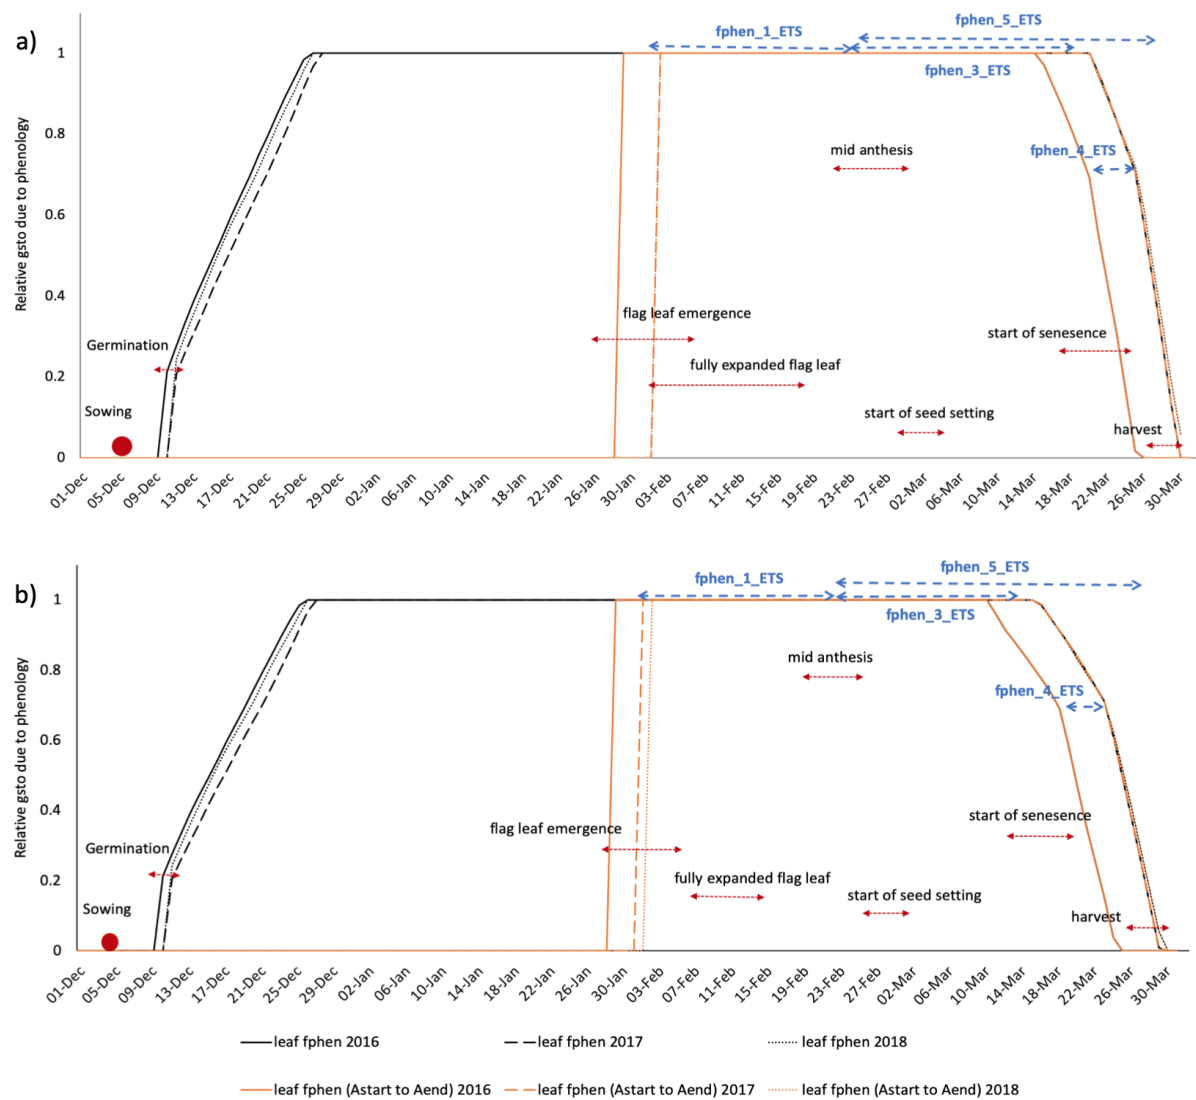

**Fig. S1.** The ETS model parameterised for HUW-234 (a) and HD-3118 (b). The time range for phenological stages observed for years 2016-18 from the experimental data are represented by red arrows; sowing, germination, flag leaf emergence, fully expanded flag leaf, start of seed setting, start of senescence and harvest. Blue arrows and labels illustrate  $f_{phen\_1-5\_ETS}$  for each cultivar.

**Table S1.** Relative yield loss (%) under elevated ozone compared to ambient ozone based on absolute grain yields obtained for HUW-234 and HD-3118 under experimental conditions in Varanasi from 2016-18. (Agrawal, Pers. Comm.)

*Ambient ozone (NF): non-filtered ozone treatment (average 51.4 ppb); elevated ozone (NF+): ambient ozone + 20ppb between 10:00-15:00 (equal to on average 65.9 ppb).*

| Cultivar | Mean grain yield under<br>NF $\pm$ SD (g m <sup>-2</sup> ) | Mean grain yield under<br>NF+ $\pm$ SD (g m <sup>-2</sup> ) | RYL obtained for NF+<br>compared to NF (%) |
|----------|------------------------------------------------------------|-------------------------------------------------------------|--------------------------------------------|
| HUW-234  | 533.4 $\pm$ 159.1                                          | 420.4 $\pm$ 130.6                                           | <b>21.2</b>                                |
| HD-3118  | 432.8 $\pm$ 104.8                                          | 332.3 $\pm$ 63.1                                            | <b>23.2</b>                                |
